# Supplementary material for: Genetic variability and consequence of Mycobacterium tuberculosis lineage 3 in Kampala-Uganda
Source: PLoS One. 2019 Sep 9;14(9):e0221644. doi: 10.1371/journal.pone.0221644 (PMC6733460; doi:10.1371/journal.pone.0221644)
Supplement: S2 Table — (DOCX) [file pone.0221644.s002.docx]

**S2 Table**

| **SIT #** | **Frequency** | **Spoligotype pattern** | **Sub lineage** |
| --- | --- | --- | --- |
| **Orphan** | **1** | | ■■■■■■■■■■■■■■■■■■■■■■□□■■□□□□■■□□■■■■■■■■■ | | --- | | **Unknown** |
| **Orphan** | **1** | | ■■■■■■■■■□■■■■■■■■■■■■■■■■■■■■■■□□■■■■■■■■■ | | --- | | **Unknown** |
| **Orphan** | **1** | | ■■■□■■■□■■■■■■■■■■■■□□□□■■□□□□■■□□□□■■■■■■■ | | --- | | **Unknown** |
| **Orphan** | **1** | | ■■■□□■□■■□■■■■■■■■■■■■■■■■□□■□■■□□■■■■■■■■■ | | --- | | **Unknown** |
| **Orphan** | **1** | | ■■■□□□□■■■■■■■■■■■■□■■□□□□□□□□□□□□□□□□■■■■■ | | --- | | **Unknown** |
| **Orphan** | **1** | | ■■■□□□□■■■■■□□■■■■■■■■□□□□□□□□□□□□■■□■■□■■■ | | --- | | **Unknown** |
| **Orphan** | **1** | | ■■■□□□□■■□■■■■■■■■■□□□□□□□□□□□□□□□□■■□□■■■■ | | --- | | **Unknown** |
| **Orphan** | **1** | | ■■■□□□□■■□■■■■□■■■■□□□□□□□□□□□□□□□■■■■□■■■■ | | --- | | **Unknown** |
| **Orphan** | **2** | | ■■■□□□□■■□■■■□■■■■■■■■□□□□□□□□□□□□■■■■■■■■■ | | --- | | **Unknown** |
| **Orphan** | **1** | | ■■■□□□□□□■■■■■■■■■■■□□□□□□□□□□□□□□□■■■■■■■■ | | --- | | **Unknown** |
| **Orphan** | **1** | | ■■■□□□□□□□■■■■■■■■■■■■□□□■■■■■■■□□■■■■■■■■■ | | --- | | **Unknown** |
| **Orphan** | **1** | | ■■■□□□□□□□■■■□■■■■■■■■□□□□□□□□□□□□■■■■■■■■■ | | --- | | **Unknown** |
| **Orphan** | **1** | | ■□■□□□□□■□■□■□□■■■■■■□□□□□□□□□□□□□■■□■□■■□■ | | --- | | **Unknown** |
| **Orphan** | **2** | | □□□□□□□■■■■■■■■■■■■■■■■■■■■■■■■■□□□□■■■□■■■ | | --- | | **Unknown** |
| **Orphan** | **1** | | ■■■□□□□■■■■■■■■■■■■□■■□□□□□□□□□□□□□□□□■■■■■ | | --- | | **Unknown** |
